# Supplementary material for: Neighbouring time ensemble Kalman filter (NTEnKF) data assimilation for dust storm forecasting
Source: Copernicus journal article supplement (doi:10.5194/gmd-2023-219), 2023-12-20
Supplement: Supplementary file 1 [file gmd-2023-219-supplement.pdf]

## 1 Localization method

In order to ‘cut-off’ the spurious correlation in the background covariance matrix  $\mathbf{P}^f$ , a correlation matrix  $\mathbf{L}$  filled with local supports is introduced. Local support is a term meaning that the function is only non-zero in a local region and is zero elsewhere. The local support function is set as:

$$5 \quad \mathbf{S}_{i,j} = \frac{\mathbf{D}_{i,j}}{L_{thres}} \quad (1)$$

$$\mathbf{L}_{i,j} = \begin{cases} 1 - \frac{5}{3}\mathbf{S}_{i,j}^2 + \frac{5}{8}\mathbf{S}_{i,j}^3 + \frac{1}{2}\mathbf{S}_{i,j}^4 - \frac{1}{4}\mathbf{S}_{i,j}^5, & \mathbf{S}_{i,j} < 1 \\ -\frac{2}{3}\mathbf{S}_{i,j}^{-1} + 4 - 5\mathbf{S}_{i,j} + \frac{5}{3}\mathbf{S}_{i,j}^2 + \frac{5}{8}\mathbf{S}_{i,j}^3 - \frac{1}{2}\mathbf{S}_{i,j}^4 + \frac{1}{12}\mathbf{S}_{i,j}^5, & 1 \leq \mathbf{S}_{i,j} < 2 \\ 0, & \mathbf{S}_{i,j} \geq 2 \end{cases} \quad (2)$$

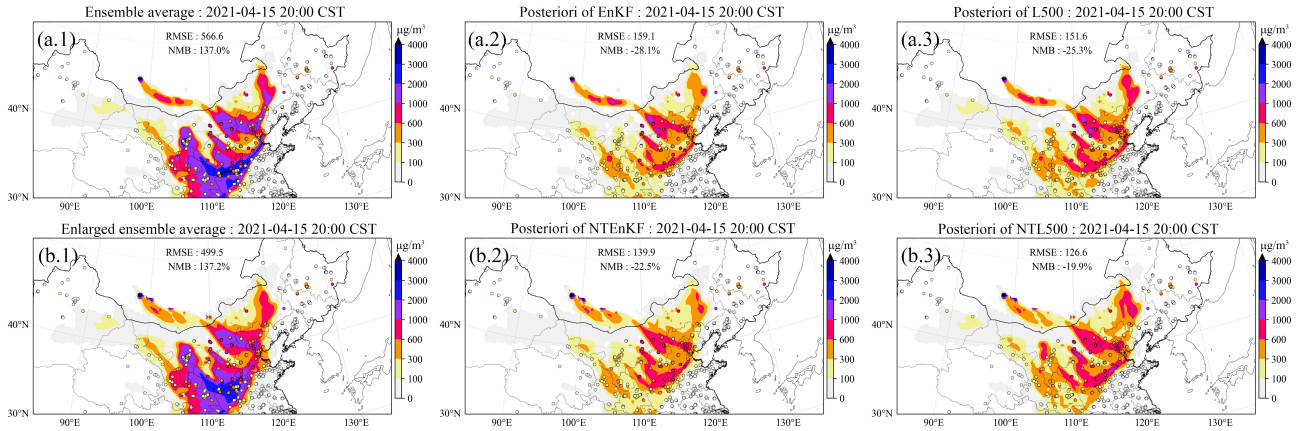

**Figure S1.** Spatial distribution of ground-based BR-PM<sub>10</sub> observations (scatter) and simulated dust plume (SDP) on surface from central time ensemble model mean **(a.1)**, the posterior SDP updated by EnKF **(a.2)**, the posterior SDP updated by EnKF with localization distance of 500 km **(a.3)**, central and neighboring time ensemble model mean **(b.1)**, the posterior SDP updated by NTEKF **(b.2)**, the posterior SDP updated by NTEKF with localization distance of 500 km **(b.3)** at 20:00, 15th April 2021 (CST). BR-PM<sub>10</sub>:baseline-removed PM<sub>10</sub>

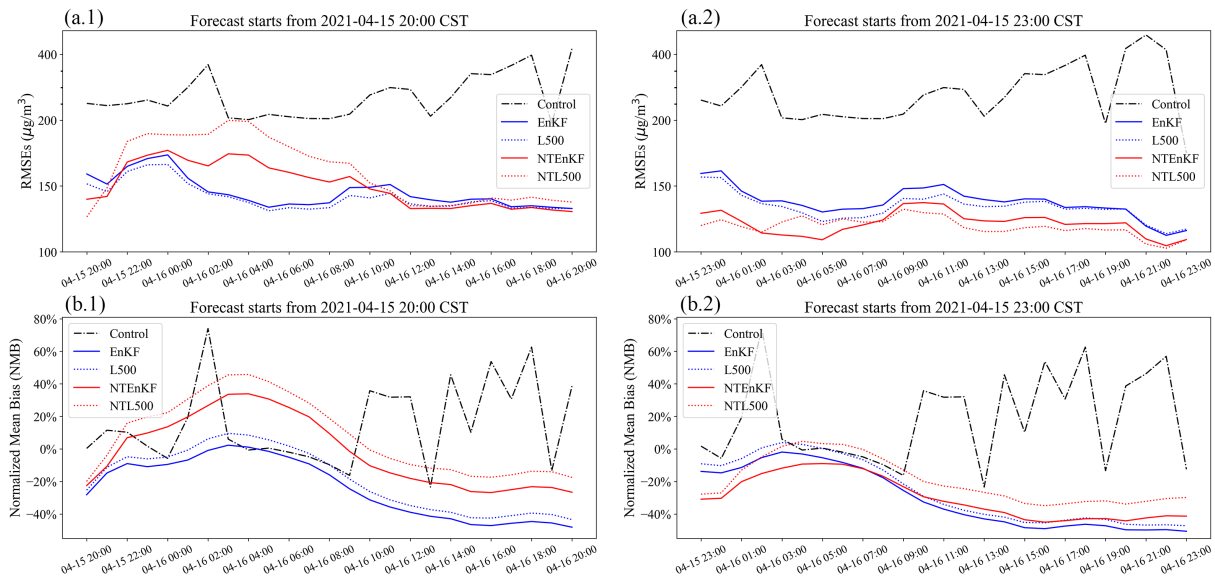

**Figure S2.** Variation of 24 hours forecast RMSEs starting from 20:00 (a.1), 23:00 (a.2) and normalized mean bias (NMB) starting from 20:00 (b.1), 23:00 (b.2) on 15th April 2021.
